# Supplementary material for: Low-voltage-driven and highly-diffractive holographic polymer dispersed liquid crystals with spherical morphology
Source: Royal Society of Chemistry journal article supplement (doi:10.1039/c7ra08949j), 2017-01-01
Supplement: c7ra08949j1.pdf [file c7ra08949j1.pdf]

*Supporting information for*

**Low-Voltage-Driven and Highly-Diffractive Holographic Polymer Dispersed  
Liquid Crystals with Spherical Morphology**

Haiyan Peng,<sup>a</sup> Lei Yu,<sup>a</sup> Guannan Chen,<sup>a</sup> Trent William Bohl,<sup>a</sup> Yunsheng Ye,<sup>a</sup> Xingping  
Zhou,<sup>a,b,\*</sup> Zhigang Xue,<sup>a</sup> V. A. L. Roy,<sup>c</sup> Xiaolin Xie<sup>a,d,\*</sup>

<sup>a</sup> Key Laboratory for Material Chemistry of Energy Conversion and Storage, Ministry  
of Education, School of Chemistry and Chemical Engineering, Huazhong University of  
Science and Technology, Wuhan 430074, China.

<sup>b</sup> Hubei Key Laboratory of Material Chemistry and Service Failure, School of  
Chemistry and Chemical Engineering, Huazhong University of Science and  
Technology, Wuhan 430074, China.

<sup>c</sup> Department of Physics and Materials Science, City University of Hong Kong, Tat  
Chee Avenue, Kowloon Tong, Hong Kong SAR, China.

<sup>d</sup> National Anticounterfeit Engineering Research Center, Wuhan 430074, China.

Corresponding authors: X. Zhou (xpzhou@mail.hust.edu.cn),

X. Xie (xlxie@mail.hust.edu.cn)

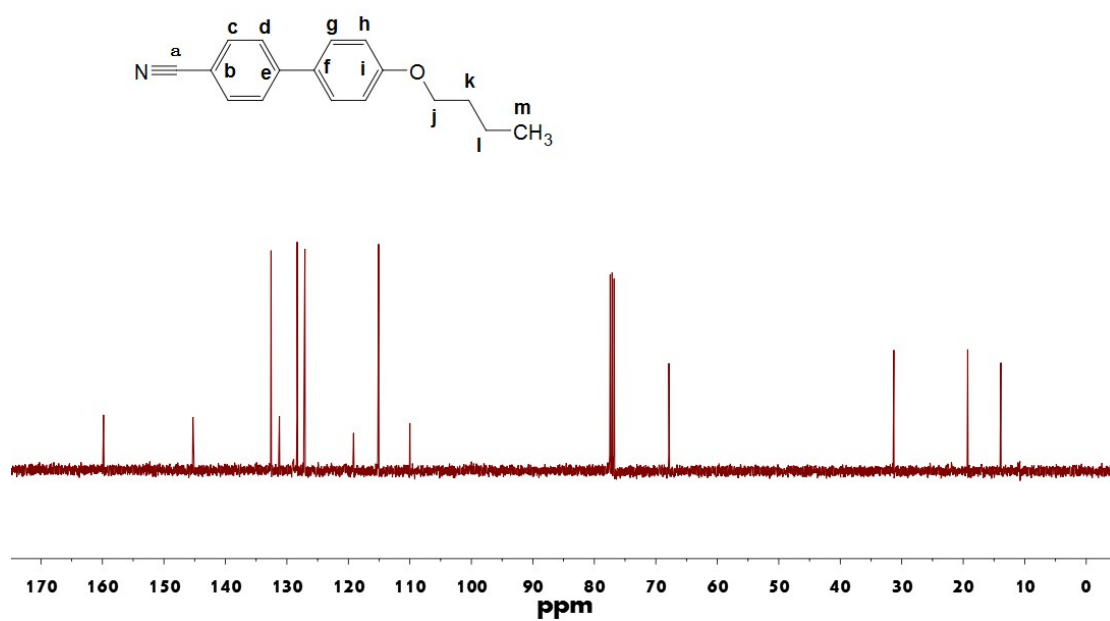

**Figure S1.**  $^{13}\text{C}$  NMR spectrum of the as-synthesized 4OCB. (400 MHz,  $\text{CDCl}_3$ )  $^{13}\text{C}$ -NMR  $\delta$ [ppm]: 159.86 (i), 145.26 (e), 132.52 (c), 131.20 (f), 128.28 (g), 127.03 (d), 119.07 (a), 115.10 (h), 110.03 (b), 67.80 (j), 31.28 (k), 19.26 (l), 13.85 (m).

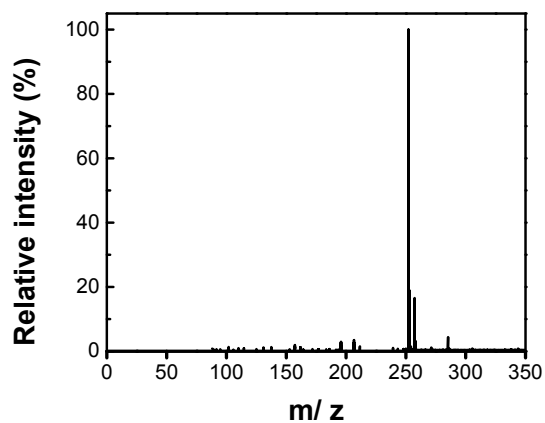

**Figure S2.** Mass spectrum of the as-synthesized 4OCB. Calculated  $[\text{C}_{17}\text{H}_{18}\text{NO}]^+$  ( $\text{MH}^+$ ):  $m/z$  252.1344; found: 252.1378.

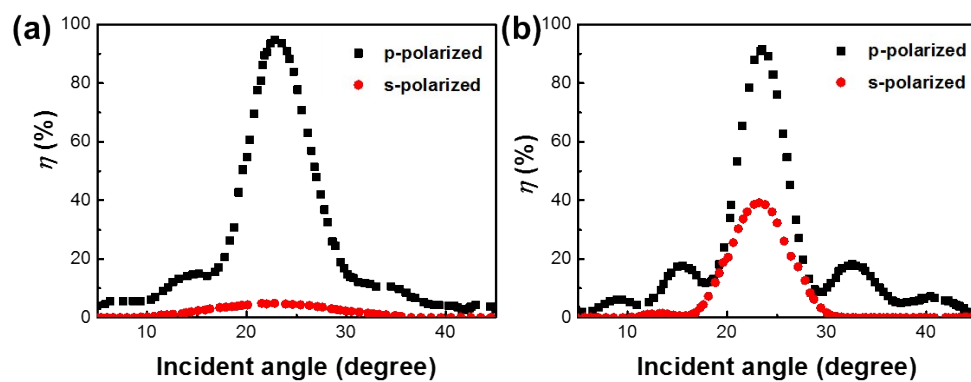

**Figure S3.** Representing polarization dependent diffraction efficiency,  $\eta$ , for the HPDLC gratings (a) without 4OCB, and (b) with 5 wt% 4OCB.

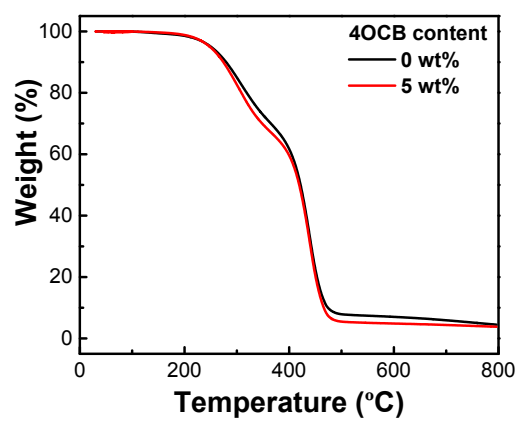

**Figure S4.** TGA curves of the HPDLC gratings without and with 5 wt% 4OCB. No weight loss is noted up to 104 °C, and only 1 wt% weight loss occurred up to 180 °C.
